# Supplementary material
Source: PubMed Central journal article supplement (PMC7408296)
Supplement: NIHMS1588038-supplement-Supplement_Figure_S1.pdf [file NIHMS1588038-supplement-Supplement_Figure_S1.pdf]

**Orthodontist ID #:**                      **Office #:**                      **Google Negative Review #:**                      **Yelp Negative Review #:**                      **Rating:**

Pt indicated transfer (100)

**WHO (check all that apply)**

Orthodontist (1)                       Clinical Assistants (2)                       Reception/Office Manager/Billing (3)                       N.S.(4)

**WHEN (check all that apply)**

- Pre-Appointment (1)                       (11)                       (21)                       (31)                       (41)
- Recall (2)                       (12)                       (22)                       (32)                       (42)
- Exam / Consult / Records (3)                       (13)                       (23)                       (33)                       (43)
- 2nd Opinion (4)                       (14)                       (24)                       (34)                       (44)
- During Tx (5)                       (15)                       (25)                       (35)                       (45)
- Retention / Post phase 2/comp Tx (6)                       (16)                       (26)                       (36)                       (46)
- Emergency Appt (7)                       (17)                       (27)                       (37)                       (47)
- Not Specified / In General (8)                       (18)                       (28)                       (38)                       (48)

**WHAT (check all that apply)**

- TIME**
- Long in waiting room/ Running behind/ rushed/ waiting for Dr. (11)                       (111)                       (211)                       (311)                       (411)
  - Tx. Appt - Too long (12)                       (112)                       (212)                       (312)                       (412)
  - Tx duration too long (13)                       (113)                       (213)                       (313)                       (413)
  - Too many appts/ too frequent (14)                       (114)                       (214)                       (314)                       (414)
  - Schedule appts - poor avail. / inflexible scheduling (15)                       (115)                       (215)                       (315)                       (415)
  - Scheduling errors, changes (16)                       (116)                       (216)                       (316)                       (416)
  - Disrespect / inconsiderate of people's time (17)                       (117)                       (217)                       (317)                       (417)
  - Too much time between appointments (18)                       (118)                       (218)                       (318)                       (418)
  - Other (10)                       (110)                       (210)                       (310)                       (410)

If Other, Describe Here (10): \_\_\_\_\_

**MONEY/FINANCIAL**

- Too (very) expensive/ Tx not worth \$\$ (21)                       (121)                       (221)                       (321)                       (421)
- Re-Tx too expensive (22)                       (122)                       (222)                       (322)                       (422)
- More \$ than others (23)                       (123)                       (223)                       (323)                       (423)
- Extra (hidden) cost/ price change/incorrect quotes/ overcharge (24)                       (124)                       (224)                       (324)                       (424)
- \$\$ before patients/ Greedy (25)                       (125)                       (225)                       (325)                       (425)
- Billing/Insurance/ Flex Spending Account Problems (26)                       (126)                       (226)                       (326)                       (426)
- Hard Sell/ Salesman/ 'pushy' rushed to start (27)                       (127)                       (227)                       (327)                       (427)
- Paid for service not delivered/ completed/ No Refund (28)                       (128)                       (228)                       (328)                       (428)
- Transfer costs (29)                       (129)                       (229)                       (329)                       (429)
- Harass for money / send to collections (30)                       (130)                       (230)                       (330)                       (430)
- Costs are not transparent / unclear / no breakdown (31)                       (131)                       (231)                       (331)                       (431)
- Inflexible financing / no refinancing options (32)                       (132)                       (232)                       (332)                       (432)
- Other (20)                       (120)                       (220)                       (320)                       (420)

If Other, Describe Here (20): \_\_\_\_\_

**COMMUNICATION**

- Doesn't Listen to Pt. / misunderstands Pt. (41)                       (141)                       (241)                       (341)                       (441)
- Didn't explain well / gave inaccurate information (42)                       (142)                       (242)                       (342)                       (442)
- Didn't answer questions (in-person/phone) / didn't return call (43)                       (143)                       (243)                       (343)                       (443)
- Tx details/options/Tx Plan not explained-given/ no Tx updates (44)                       (144)                       (244)                       (344)                       (444)
- Inaccessible (no answer phone)/ don't acknowledge/no check-in (45)                       (145)                       (245)                       (345)                       (445)
- No reminder phone calls/ appointment Alerts (46)                       (146)                       (246)                       (346)                       (446)
- Other (40)                       (140)                       (240)                       (340)                       (440)

If Other, Describe Here (40): \_\_\_\_\_

**INTERPERSONAL**

- Poor Personality/ Poor Social Skills/ Awkward/ Not friendly (51)  (151)  (251)  (351)  (451)
- Dishonest/Lie/ Distrust/ Cheated/Lie for financial gain (52)  (152)  (252)  (352)  (452)
- Uncaring/ Pt not priority/ Not accommodating/ Ignored (53)  (153)  (253)  (353)  (453)
- Insensitive (& ethnic, cultural)/ Inconsiderate/ Judgmental (54)  (154)  (254)  (354)  (454)
- Disrespectful/ Demeaning/ Condescending (55)  (155)  (255)  (355)  (455)
- Aggressive/ Argue/ Angry/ Harass (56)  (156)  (256)  (356)  (456)
- Impolite/ Rude/ Mean/ Arrogant/ Insulting/ Humiliate (57)  (157)  (257)  (357)  (457)
- Comments about prior Tx; critical of other clinician opinions (58)  (158)  (258)  (358)  (458)
- Blaming Patient for results/ tardiness/ crooked teeth (59)  (159)  (259)  (359)  (459)
- Too much unnecessary chit-chat hinders work (60)  (160)  (260)  (360)  (460)
- Psychologically disturbed / unfit for job (61)  (161)  (261)  (361)  (461)
- Other (50)  (150)  (250)  (350)  (450)

If Other, Describe here: \_\_\_\_\_

**QUALITY OF CARE / SERVICE**

- Disagree with: Plan/ Approach/ Judgment/ Need for tx (71)  (171)  (271)  (371)  (471)
- Poor Interdisciplinary care /Poor referral/ Poor sending records (72)  (172)  (272)  (372)  (472)
- Not hygienic/ sanitary/ re-using single use only (73)  (173)  (273)  (373)  (473)
- No time for pt/ Factory environ/ Inattentive/ Don't see main ortho (74)  (174)  (274)  (374)  (474)
- Bad outcome (not relapse): complication/ not finish/poor progress (75)  (175)  (275)  (375)  (475)
- Pain Complaints/ Procedures uncomfortable (76)  (176)  (276)  (376)  (476)
- Broken (or poor quality) appliance/Brackets/ wire (77)  (177)  (277)  (377)  (477)
- Poor skill, ability, office organization/coordination; Errors (78)  (178)  (278)  (378)  (478)
- Tx not Individualized (79)  (179)  (279)  (379)  (479)
- Other (70)  (170)  (270)  (370)  (470)

If Other, Describe here: \_\_\_\_\_

**HIPAA (check all that apply)**

- (180)  (280)  (380)  (480)

**UNPROFESSIONAL (check all that apply)**

- (190)  (290)  (390)  (490)

**MISCELLANEOUS (50-55) (check all that apply)**

- Retainer - Lost / Broken / Replace / Relapse (50)  (50) No Identifiable Complaint (51)  (51)
- Poor Customer Service (52)  (52) Refusal to treat (or continue to treat) (53)  (53)
- Formal complaints filed or threatened / legal action (54)  (54)
- Other  (55). If Other, Describe here: \_\_\_\_\_

**OFFICE CHARACTERISTICS (60-71) (check all that apply)**

- Office Layout / Office design (60)  (60) Automated Patient contact (61)  (61)
- Bad parking / poor office accessibility (62)  (62) Multiple providers (too many) / high staff turnover (63)  (63)
- Office cleanliness / shabby (64)  (64) Office catered towards only children / adults (65)  (65)
- Office is too nice / too fancy (66)  (66) Outdated technology / methods / not modern (67)  (67)
- Lack of privacy during treatment (68)  (68) Inconvenient location (69)  (69)
- Poor office hours / days open (70)  (70)
- Other  (71). If Other, Describe here: \_\_\_\_\_

**Office Response (92-97) (check all that apply)**

- Type of Office Response:  Apologetic (92)  Defensive (93)  Thanking (94)  Argumentative (95)
- Explanatory / Informative (96)  Questioning validity of review (97)
