# Supplementary material
Source: PubMed Central journal article supplement (PMC7408296)
Supplement: NIHMS1588038-supplement-Supplement_Table_S1.pdf [file NIHMS1588038-supplement-Supplement_Table_S1.pdf]

**Supplemental Table S1** lists the types of complaints that were mentioned in at least 1% of the negative reviews evaluated (i.e.,  $\geq 10$  of the 956 reviews). Each type of complaint was further classified according to who was identified as being responsible, i.e., the: 1) Orthodontist, 2) Clinical Assistants, 3) Non-Clinical Office Staff, 4) Not Specified. Because a single online review could contain the same type of complaint about different personnel, an individual review could be counted more than once regarding who was responsible. Therefore, the number of online reviews mentioning a type of complaint is not the sum of the reviews that were attributed to personnel categories for that complaint.

| Types of Complaints in Online Reviews                       | Number (%) of 956 Reviews | Number (%) of Reviews Per Complaint Attributed to Each Source |                  |              |               |
|-------------------------------------------------------------|---------------------------|---------------------------------------------------------------|------------------|--------------|---------------|
|                                                             |                           | Orthodontist                                                  | Clin. Assistants | Office Staff | Not Specified |
| <b>QUALITY OF CARE / SERVICE</b>                            | 509 (53.2%)               |                                                               |                  |              |               |
| Bad outcome (not relapse) / Not finish / Complications      | 204 (21.3%)               | 164 (80.4%)                                                   | 5 (2.5%)         | 1 (0.5%)     | 34 (16.7%)    |
| Errors: Poor skill, ability, office organization            | 173 (18.1%)               | 84 (48.6%)                                                    | 60 (34.7%)       | 24 (13.9%)   | 31 (17.9%)    |
| No time for patient / Factory environment / Inattentive     | 135 (14.1%)               | 108 (80.0%)                                                   | 5 (3.7%)         | 6 (4.4%)     | 24 (17.8%)    |
| Disagree with: Plan / Approach / Need for treatment         | 98 (10.3%)                | 93 (94.9%)                                                    | 0 (0.0%)         | 3 (3.1%)     | 2 (2.0%)      |
| Pain complaints / Procedures uncomfortable                  | 68 (7.1%)                 | 37 (54.4%)                                                    | 19 (27.9%)       | 3 (4.4%)     | 10 (14.7%)    |
| Broken (or poor quality): Appliance / Brackets / Wire       | 55 (5.8%)                 | 20 (36.4%)                                                    | 13 (23.6%)       | 1 (1.8%)     | 22 (40.0%)    |
| Not hygienic / Not sanitary                                 | 22 (2.3%)                 | 17 (77.3%)                                                    | 2 (9.1%)         | 1 (4.5%)     | 4 (18.2%)     |
| Poor interdisciplinary care / referral / sending records    | 20 (2.1%)                 | 9 (45.0%)                                                     | 0 (0.0%)         | 6 (30.0%)    | 6 (30.0%)     |
| <b>INTERPERSONAL</b>                                        | 497 (52.0%)               |                                                               |                  |              |               |
| Impolite / Rude / Mean / Arrogant / Insult / Humiliate      | 225 (23.5%)               | 96 (42.7%)                                                    | 29 (12.9%)       | 96 (42.7%)   | 28 (12.4%)    |
| Uncaring / Patient not priority / Patient ignored           | 129 (13.5%)               | 60 (46.5%)                                                    | 13 (10.1%)       | 41 (31.8%)   | 25 (19.4%)    |
| Dishonest / Lie / Distrust / Cheated                        | 109 (11.4%)               | 54 (49.5%)                                                    | 6 (5.5%)         | 33 (30.3%)   | 24 (22.0%)    |
| Poor personality - social skills / Awkward / Unfriendly     | 95 (9.9%)                 | 53 (55.8%)                                                    | 9 (9.5%)         | 27 (28.4%)   | 12 (12.6%)    |
| Disrespectful / Demeaning / Condescending                   | 73 (7.6%)                 | 50 (68.5%)                                                    | 5 (6.8%)         | 10 (13.7%)   | 11 (15.1%)    |
| Blaming patient for: Results / Tardiness / Crooked teeth    | 45 (4.7%)                 | 30 (66.7%)                                                    | 5 (11.1%)        | 8 (17.8%)    | 4 (8.9%)      |
| Insensitive (ethnic, cultural) / Inconsiderate / Judgmental | 44 (4.6%)                 | 28 (63.6%)                                                    | 8 (18.2%)        | 6 (13.6%)    | 3 (6.8%)      |
| Aggressive / Argue / Angry / Harass                         | 40 (4.2%)                 | 33 (82.5%)                                                    | 1 (2.5%)         | 7 (17.5%)    | 1 (2.5%)      |
| <b>MONEY / FINANCIAL</b>                                    | 448 (46.9%)               |                                                               |                  |              |               |
| Money before patients / Greedy                              | 149 (15.6%)               | 93 (62.4%)                                                    | 0 (0.0%)         | 14 (9.4%)    | 47 (31.5%)    |
| Extra (hidden) costs / Price change / Overcharge            | 104 (10.9%)               | 47 (45.2%)                                                    | 0 (0.0%)         | 38 (36.5%)   | 20 (19.2%)    |
| Too (very) expensive / Treatment not worth money            | 101 (10.6%)               | 68 (67.3%)                                                    | 0 (0.0%)         | 7 (6.9%)     | 26 (25.7%)    |
| Billing / Insurance / Flex spending account problems        | 84 (8.8%)                 | 9 (10.7%)                                                     | 1 (1.2%)         | 69 (82.1%)   | 6 (7.1%)      |

|                                                            |             |            |            |            |            |
|------------------------------------------------------------|-------------|------------|------------|------------|------------|
| More money than others                                     | 53 (5.5%)   | 40 (75.5%) | 0 (0.0%)   | 5 (9.4%)   | 8 (15.1%)  |
| Paid for services not: Completed / Delivered / No refund   | 47 (4.9%)   | 26 (55.3%) | 1 (2.1%)   | 13 (27.7%) | 9 (19.1%)  |
| Hard sell / Salesman / Pushy / Rushed to start treatment   | 43 (4.5%)   | 23 (53.5%) | 1 (2.3%)   | 10 (23.3%) | 11 (25.6%) |
| Re-treatment too expensive                                 | 13 (1.4%)   | 9 (69.2%)  | 0 (0.0%)   | 1 (7.7%)   | 3 (23.1%)  |
| TIME                                                       | 256 (26.8%) |            |            |            |            |
| Long wait / Running behind / Rushed                        | 93 (9.7%)   | 28 (30.1%) | 4 (4.3%)   | 22 (23.7%) | 44 (47.3%) |
| Treatment duration too long                                | 80 (8.4%)   | 59 (73.8%) | 2 (2.5%)   | 1 (1.3%)   | 19 (23.8%) |
| Appointments: Poor availability / Inflexible scheduling    | 70 (7.3%)   | 9 (12.9%)  | 0 (0.0%)   | 39 (55.7%) | 22 (31.4%) |
| Scheduling errors / changes                                | 25 (2.6%)   | 0 (0.0%)   | 1 (4.0%)   | 23 (92.0%) | 1 (4.0%)   |
| Duration of treatment appointments is too long             | 11 (1.2%)   | 4 (36.4%)  | 2 (18.2%)  | 0 (0.0%)   | 6 (54.5%)  |
| COMMUNICATION                                              | 228 (23.8%) |            |            |            |            |
| Didn't answer questions / Didn't return call               | 91 (9.5%)   | 23 (25.3%) | 2 (2.2%)   | 69 (75.8%) | 3 (3.3%)   |
| Inaccessible (not answer phone) / Don't acknowledge        | 55 (5.8%)   | 9 (16.4%)  | 1 (1.8%)   | 42 (76.4%) | 3 (5.5%)   |
| Doesn't listen to patient / Misunderstands patient         | 47 (4.9%)   | 32 (68.1%) | 3 (6.4%)   | 10 (21.3%) | 4 (8.5%)   |
| Didn't explain well / Gave inaccurate information          | 44 (4.6%)   | 22 (50.0%) | 8 (18.2%)  | 10 (22.7%) | 10 (22.7%) |
| Does not give treatment plan / details / options / updates | 25 (2.6%)   | 19 (76.0%) | 2 (8.0%)   | 4 (16.0%)  | 3 (12.0%)  |
| UNPROFESSIONAL                                             | 102 (10.7%) | 39 (38.2%) | 11 (10.8%) | 37 (36.3%) | 25 (24.5%) |
